# Supplementary material for: A multi-responsive bidirectional bending actuator based on polypyrrole and agar nanocomposites
Source: Royal Society of Chemistry journal article supplement (doi:10.1039/c8tc00747k), 2018-01-01
Supplement: c8tc00747k1.pdf [file c8tc00747k1.pdf]

**Electronic Supplementary Material (ESI) for Journal of Materials Chemistry C.**

**This journal is © The Royal Society of Chemistry 2018**

## Electronic Supplementary Information

### **A Multi-Stimuli Responsive Bidirectional Bending Actuator Based on Polypyrrole and Agar Nanocomposite**

Taoping Wang,<sup>‡</sup> Mingtong Li,<sup>‡</sup> Hui Zhang,<sup>\*</sup> Yunyu Sun, Bin Dong<sup>\*</sup>

Institute of Functional Nano & Soft Materials (FUNSOM), Jiangsu Key Laboratory for Carbon-Based  
Functional Materials & Devices, Soochow University, Suzhou, Jiangsu 215123, P. R. China, <sup>\*</sup>E-mail:  
bdong@suda.edu.cn

**Video S1.** The PPy/AG actuator after being exposed to humidity.

**Video S2.** The PPy/AG actuator upon HCl gas exposure.

**Video S3.** The performance of pure agar film when exposed to HCl gas.

**Video S4.** The continuous shape changes of the PPy/AG actuator under the synergistic actuation of humidity and NIR light.

**Video S5.** The PPy/AG film undergoing reversible sheet to curled sheet transition under the stimulation of humidity and NIR light.

**Video S6.** A walking device based on PPy/AG actuator with cargo transportation and delivery capability. NIR light is utilized to lift and release the cargo, while humidity is used to make it walk on a grooved surface.

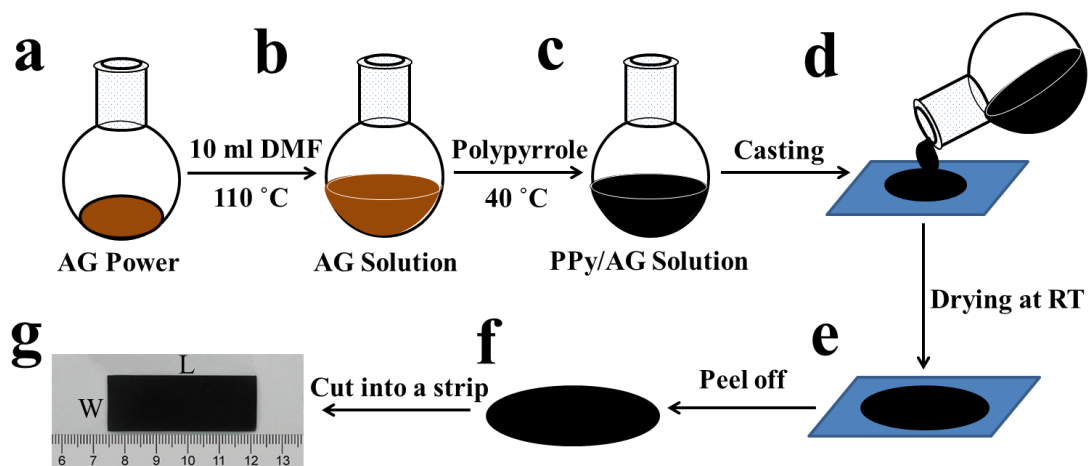

**Fig. S1** Preparation process of the PPy/AG nanocomposite film.

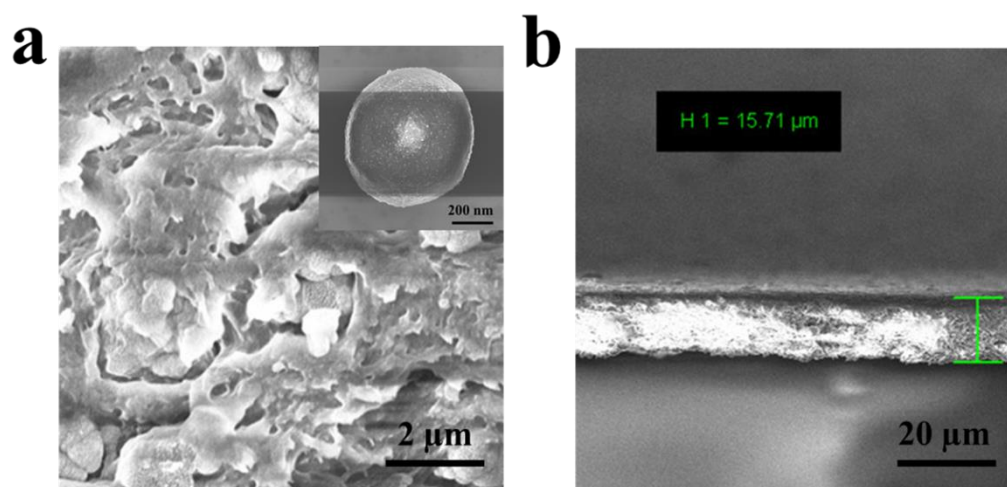

**Fig. S2** a) Top view and b) side view SEM images showing AG blended with PPYNPs. Inset of a): Enlarged SEM image of one PPYNP.

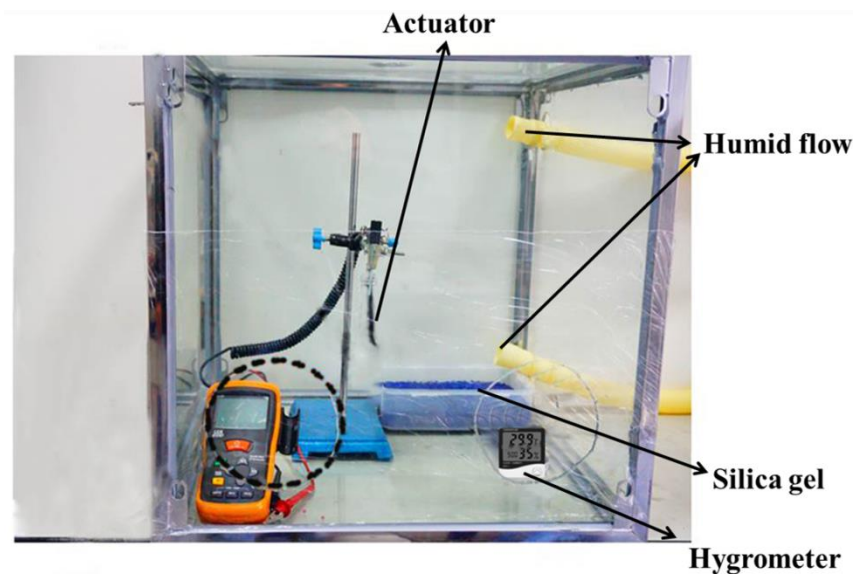

**Fig. S3** CCD image of the home built humidity chamber for the humidity driven actuator study.

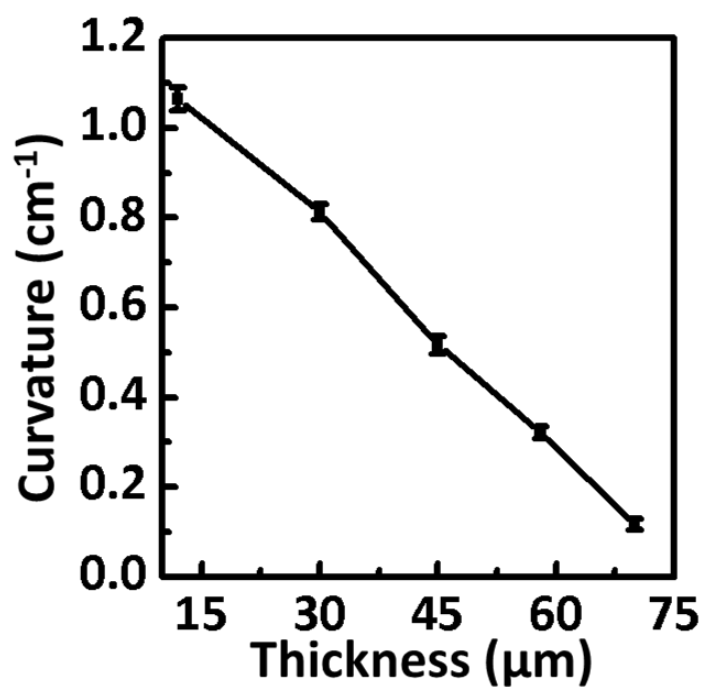

**Fig. S4** The steady state curvature of the PPy/AG actuator decreases with the increasing film thickness at fixed humidity difference  $\Delta\text{RH} = 50\%$ .

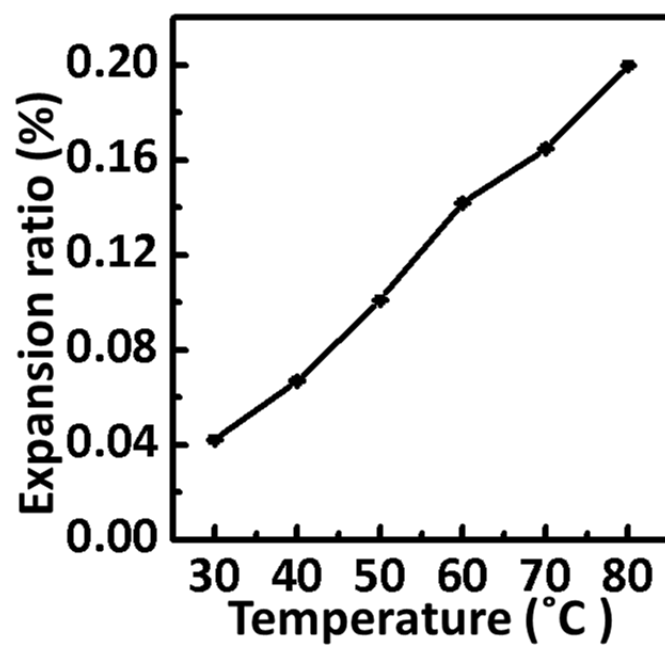

**Fig. S5** The expansion ratio of the PPy/AG actuator increases with the increasing temperature.
